# Supplementary material
Source: MDPI journal article supplement (https://www.mdpi.com/2073-4395/12/2/326)
Supplement: s1 [file s1]

**Table S1.** All genes putatively involved in coffee interaction to *Hemileia vastatrix* based on RT-qPCR analysis.

| gene          | annotation                                               | accession number/locus ID                                                                                            | reference             |
|---------------|----------------------------------------------------------|----------------------------------------------------------------------------------------------------------------------|-----------------------|
| CaRLK         | Receptor-like kinase                                     | DSS6; CF589181; GT030029.1                                                                                           | [138,140,149,152]     |
| NB-ARC domain | NB-ARC domain-containing disease resistance protein      |                                                                                                                      | [144]                 |
| SD1-8         | Receptor-like serine/threonine-protein kinase SD1-8      |                                                                                                                      | [144]                 |
| NBS-LRR       | Nucleotide-binding site–leucine-rich repeat              | DQ123968; GT030058.1                                                                                                 | [149,150]             |
| NBS-LRR       | Nucleotide-binding site–leucine-rich repeat              |                                                                                                                      | [156]                 |
| At5g39020     | Putative probable receptor-like protein kinase At5g39020 |                                                                                                                      | [144]                 |
| LRR_RLK1      | Leucine-rich repeat receptor-like protein kinase         | Contig_37_g339.t1                                                                                                    | [22]                  |
| LRR_RLK2      | Leucine-rich repeat receptor-like protein kinase         | Contig_37_g342.t1                                                                                                    | [22]                  |
| RGH1A         | Resistance gene analogs 1A                               | GT029983.1                                                                                                           | [149]                 |
| Bger1         | Beta-glucan elicitor receptor                            | GT030034.1                                                                                                           | [149]                 |
| NDR1          | Non-race specific Disease Resistance 1                   | DSS12; CO773976                                                                                                      | [138,148]             |
| NDR1b         | Non-race specific Disease Resistance 1                   |                                                                                                                      | [156]                 |
| CDPK5         | Calcium-dependent protein kinase 5                       | GT030068.1                                                                                                           | [149]                 |
| CBP           | Calmodulin-binding protein                               | GT030070.1                                                                                                           | [149]                 |
| CyP450        | Cytochrome P450                                          | DSS10; GT030005.1                                                                                                    | [148,149]             |
| HSP70         | 70-kDa heat shock proteins                               | DSS11                                                                                                                | [148]                 |
| CaWRKY1       | WRKY transcription factor 1                              | DSS16; CO773974                                                                                                      | [138,148,140,152,165] |
| CaWRKY1a      | WRKY transcription factor 1a                             |                                                                                                                      | [166]                 |
| CaWRKY1b      | WRKY transcription factor 1b                             |                                                                                                                      | [166]                 |
| CaWRKY1       | WRKY transcription factor 1                              | DQ335599                                                                                                             | [164]                 |
| CaWRKY2       | WRKY transcription factor 2                              | GT732236;GT732237;GT687640;GW428999                                                                                  | [164]                 |
| CaWRKY3       | WRKY transcription factor 3                              | GT715378;GT715379;GT669686;GT684003;GT675420;GT675421;GT675422;GT675423                                              | [164]                 |
| CaWRKY4       | WRKY transcription factor 4                              | GT704950;GT699101;GT708285;GT714188;GT723892;GT726133;GT721669;GT696023;GT696024;GT683342;GW430652;GW429682;GW452273 | [164]                 |
| CaWRKY5       | WRKY transcription factor 5                              | DV710913                                                                                                             | [164]                 |
| CaWRKY6       | WRKY transcription factor 6                              | GW460548;GW439927;GT671542;GT700942;GT688469;GT722306                                                                | [164]                 |
| CaWRKY7       | WRKY transcription factor 7                              |                                                                                                                      | [164]                 |
| CaWRKY8       | WRKY transcription factor 8                              | GT685360;GW436389                                                                                                    | [164]                 |

|                                     |                                                                               |                                                                                                                |               |
|-------------------------------------|-------------------------------------------------------------------------------|----------------------------------------------------------------------------------------------------------------|---------------|
| CaWRKY10                            | WRKY transcription factor 10                                                  | DV693086                                                                                                       | [164]         |
| CaWRKY11                            | WRKY transcription factor 11                                                  | GW489409;GW472658;GW489686;<br>GW467855                                                                        | [164]         |
| CaWRKY12                            | WRKY transcription factor 12                                                  | GW487300;GT715908                                                                                              | [164]         |
| CaWRKY13                            | WRKY transcription factor 13                                                  | wrky13: GW428837;GW469454                                                                                      | [164]         |
| CaWRKY14                            | WRKY transcription factor 14                                                  | wrky14: GT730216;GT688262;GT688263;<br>GT733537                                                                | [164]         |
| CaWRKY15                            | WRKY transcription factor 15                                                  | GT725660;GT721476;GT721477;<br>GT704531;GT707389;GT702040;<br>GT702041;GW490838;GT695761;<br>GT674787;GT704614 | [164]         |
| CaWRKY17                            | WRKY transcription factor 17                                                  | DV678740                                                                                                       | [164]         |
| CaWRKY18                            | WRKY transcription factor 18                                                  | GW452866;GW464006;GW435767                                                                                     | [164]         |
| CaWRKY19                            | WRKY transcription factor 19                                                  | wrky19: GW490173;GW439047;GW438774;<br>GW472647;GW481654                                                       | [164]         |
| CaWRKY20                            | WRKY transcription factor 20                                                  | wrky20: DV706804                                                                                               | [164]         |
| CaWRKY21                            | WRKY transcription factor 21                                                  | wrky21: DV709595.1                                                                                             | [164]         |
| CaWRKY22                            | WRKY transcription factor 22                                                  | GT685546;GT684702                                                                                              | [164]         |
| bHLH                                | Putative basic helix-loop-helix<br>(bHLH) DNA- binding<br>superfamily protein |                                                                                                                | [144]         |
| AP2-type<br>transcription<br>factor | AP2-type transcription factor                                                 | DSS17                                                                                                          | [148]         |
| bZIP56                              | transcription factor bZIP56                                                   | GT030080.1                                                                                                     | [149]         |
| CaAOS                               | Allene oxide synthase                                                         | DV704753                                                                                                       | [164]         |
| 13-LOX                              | Lipoxygenase 13                                                               | DV704189                                                                                                       | [140,164]     |
| 9-LOX                               | Lipoxygenase 9                                                                | DV711018                                                                                                       | [164]         |
| LOX                                 | Lipoxygenase                                                                  | DQ123948                                                                                                       | [150]         |
| CaPAL                               | Phenylalanine ammonia lyase                                                   | DQ067599; JF838179                                                                                             | [140]         |
| NPR1                                | Non-expressor of pathogenesis-<br>related gene                                |                                                                                                                | [156]         |
| CaGT                                | Salicylic acid-<br>glucosyltransferase                                        | DSS22; CO773975                                                                                                | [140,148,152] |
| Aco1                                | ACC oxidase ACO1                                                              | GT030071.1                                                                                                     | [149]         |
| ERB2                                | Ethylene-responsive element<br>binding protein 2                              | GT030055.1                                                                                                     | [149]         |
| ERF                                 | Ethylene-responsive<br>transcription factor 1B                                |                                                                                                                | [144]         |
| CaR111                              | Unknown function                                                              | DSS23; CF589193                                                                                                | [138,148,152] |
| ABC                                 | PDR-type ABC transporter 1                                                    | DQ123937                                                                                                       | [150]         |
| PR1                                 | Pathogenesis-related protein 1                                                |                                                                                                                | [144,156]     |
| CaPR1b                              | Pathogenesis-related protein 1b                                               | DQ335594                                                                                                       | [140,152]     |
| PR2/GLU                             | Pathogenesis-related protein 2<br>(beta-1,3-glucanase)                        | DQ123927                                                                                                       | [150]         |
| PR5                                 | Pathogen-related protein 5<br>(thaumatin-like gene)                           | GT030025.1                                                                                                     | [149,156]     |
| CaPR10                              | Pathogenesis-related protein 10                                               | CF589103                                                                                                       | [140,152]     |
| CaCHS                               | Chalcone synthase                                                             | CF588802                                                                                                       | [140]         |

|                            |                                                                                |                        |       |
|----------------------------|--------------------------------------------------------------------------------|------------------------|-------|
| POX                        | Peroxidase                                                                     | GT029982.1             | [149] |
| PNC2                       | Cationic peroxidase 2                                                          |                        | [144] |
| GR                         | Glutathione reductase                                                          | GT029995.1; GT030078.1 | [149] |
| UbiE2                      | Ubiquitin-conjugating enzyme E2                                                | GT030022.1             | [149] |
| Pto-like                   | Pto R protein kinase-like                                                      | GT030035.1             | [149] |
| SAMsI                      | S-adenosyl-L-methionine synthetase-like                                        | GT030037.1             | [149] |
| MAPK2                      | Mitogen-activated protein kinase 2                                             | GT030062.1             | [149] |
| MAPK3                      | Mitogen-activated protein kinase 3                                             | GT030039.1             | [149] |
| MEK2                       | Dual specificity mitogen-activated protein kinase kinase 2                     | GT030000.1             | [149] |
| SAG12                      | Senescence-associated gene 12–cysteine type peptidase                          | GT030042.1             | [149] |
| R1A-6                      | Putative late blight resistance protein homolog R1A-6                          |                        | [144] |
| RGA1                       | Putative disease resistance protein RGA1                                       |                        | [144] |
| PUB24                      | Putative E3 ubiquitin-protein ligase PUB24                                     |                        | [144] |
| ITN1                       | Putative ankyrin repeat-containing protein At3g12360                           |                        | [144] |
| Dirigent-like protein      | Putative disease resistance-responsive (dirigent- like protein) family protein |                        | [144] |
| Premnaspiridione oxygenase | Premnaspiridione oxygenase                                                     |                        | [144] |

n.a. – not available
